# Supplementary material
Source: PubMed Central journal article supplement (PMC9292139)

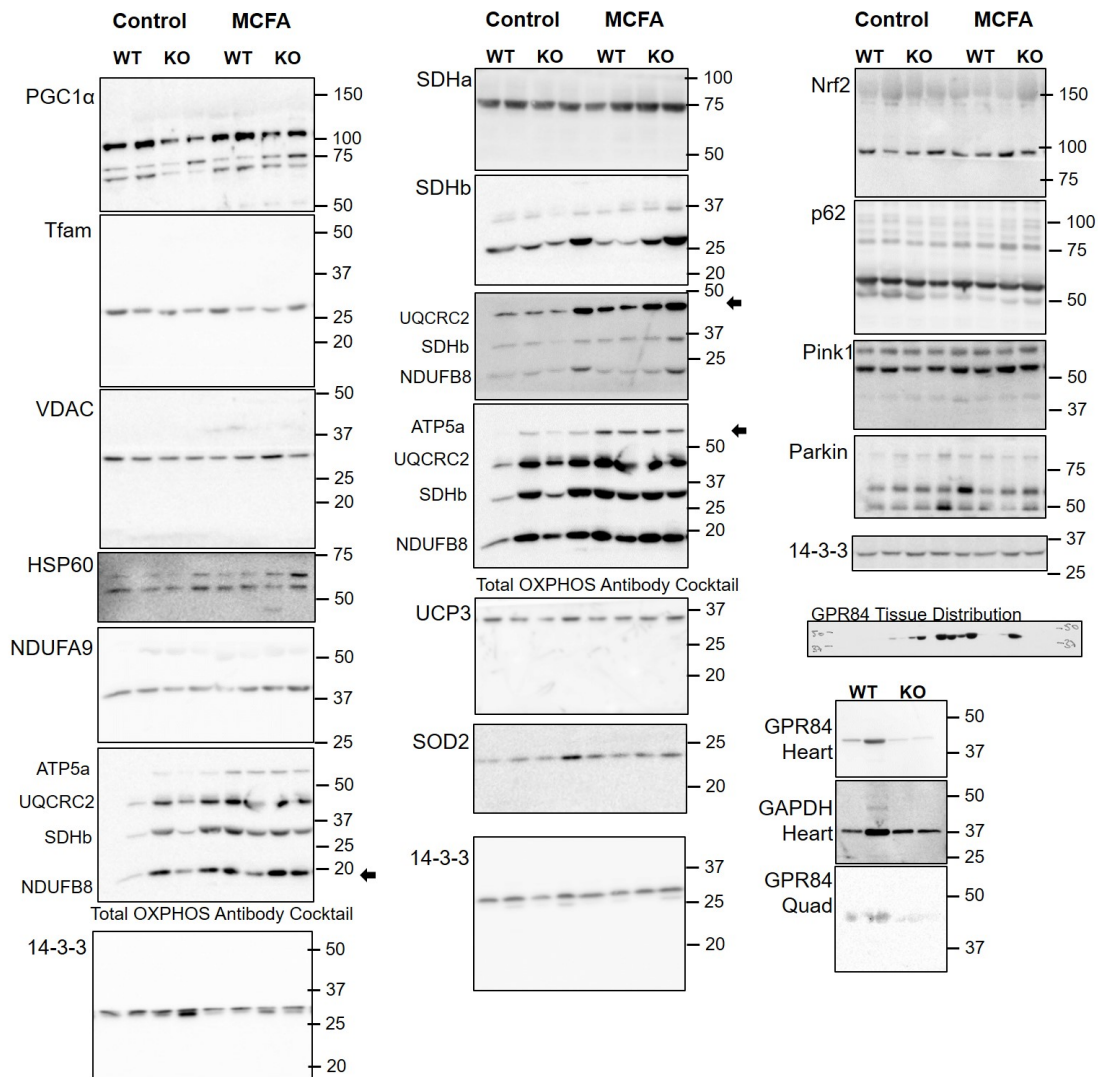

**Figure S2.** Uncropped immunoblotting membranes for manuscript Figures 1, 2 and 5.

Supplement: FSB2-33-12264-s006.pdf [file FSB2-33-12264-s006.pdf]
